# Supplementary material
Source: publisher site journal article supplement (https://www.kjim.org/upload/media/kjim-2020-195-suppl5.pdf)
Supplement: Supplementary file 1 [file kjim-2020-195-suppl5.pdf]

**Supplementary Table 5. Diagnostic indices of the clinical criteria of HT-N to distinguish biopsy-proven HT-N in total cohort.**

| Clinical criteria       | No. of biopsy-proven HT-N | Sensitivity (95% CI) | Specificity (95% CI) | PPV (95% CI)        | NPV (95% CI)        | DOR (95% CI)        |
|-------------------------|---------------------------|----------------------|----------------------|---------------------|---------------------|---------------------|
| Criteria 1 (n = 10,659) | 368                       | 1.000 (0.990–1.000)  | 0.466 (0.459–0.473)  | 0.035 (0.031–0.038) | 1.000 (1.000–1.000) | -                   |
| Criteria 2 (n = 6,839)  | 253                       | 0.688 (0.637–0.735)  | 0.668 (0.662–0.675)  | 0.037 (0.033–0.042) | 0.991 (0.990–0.993) | 4.429 (3.546–5.532) |
| Criteria 3 (n = 2,927)  | 142                       | 0.386 (0.336–0.438)  | 0.860 (0.855–0.864)  | 0.049 (0.041–0.057) | 0.987 (0.985–0.989) | 3.849 (3.108–4.766) |

Criteria 1 includes only hypertension. Criteria 2 includes hypertension, no diabetes, and no evidence of vasculitis or lupus nephritis. Criteria 3 is criteria 2 plus urine protein-to-creatinine ratio < 2.0 g/g.

HT-N, hypertensive nephrosclerosis; CI, confidence interval; PPV, positive predictive value; NPV, negative predictive value; DOR, diagnostic odds ratio.
